# Supplementary material
Source: publisher site journal article supplement (https://www.dovepress.com/get_supplementary_file.php?f=444296.docx)
Supplement: Supplementary file 1 [file get_supplementary_file.php]

Figure S1 Timeline Figure showing when the different hospital visits occurred and which procedures were done.

31/7/23

Supportive care: Tranexamic acid, fansidar, blood transfusion PRN.

22/6/23

Splenectomy done. Gaucher cells seen in the spleen.

Supportive care on going, bony changes have been noticed on X-ray. Follow-up continues.

Admitted at Mbarara Hospital. Diagnosed with malaria, hyperreactive malaria splenomegaly, malignancy suspected. Bone marrow biopsy done.

Admitted in a peripheral health center for epistaxis and fever. Later referred to Mbarara for further management of epistaxis

Bone marrow smears and biopsy show Gaucher cells. Gauchers’ disease confirmed.

17/2/23

23/2/23

3rd/2/23

2 years history of spontaneous epistaxis, worsening overtime and recurrent treatment for malaria.
